# Supplementary material for: Web-Based Peer Navigation for Men with Prostate Cancer and Their Family Caregivers: A Pilot Feasibility Study
Source: MDPI journal article supplement (doi:10.3390/curroncol29060343), 2022-06-15
Supplement: s1 [file s1]

## Supplementary File S1 – Author-Developed Satisfaction and Benefits Measures

### Section A: Your Satisfaction with Program

#### A1. We would like to know about your views about the TrueNTH Peer Navigation Program.

1. Please use the scale below to rate your **level of satisfaction** with each the following aspects of the program:

| Not at all Satisfied     |                          |                          |                          | Moderately Satisfied     |                          |                          |                          | Completely Satisfied     |                          |                          |  |
|--------------------------|--------------------------|--------------------------|--------------------------|--------------------------|--------------------------|--------------------------|--------------------------|--------------------------|--------------------------|--------------------------|--|
| 1                        | 2                        | 3                        | 4                        | 5                        | 6                        | 7                        | 8                        | 9                        | 10                       |                          |  |
| <input type="checkbox"/> |  |

- 1) Overall satisfaction with the TrueNTH Peer Navigation Program\_\_\_\_\_
- 2) The length of the program\_\_\_\_\_
- 3) Availability of your Peer Navigator to address your support needs\_\_\_\_\_
- 4) Your interactions with your Peer Navigator\_\_\_\_\_
- 5) Support received from your Peer Navigator\_\_\_\_\_
- 6) Availability of program staff to address your program-related questions\_\_\_\_\_
- 7) Availability of program staff to address your technical-related questions\_\_\_\_\_
- 8) Your interactions with the program staff \_\_\_\_\_
- 9) Support received from the program staff\_\_\_\_\_
- 10) Process of registering on the program website\_\_\_\_\_
- 11) Approach to matching you with a Peer Navigator \_\_\_\_\_
- 12) Messaging/chat feature on the program website for communicating with your Peer Navigator\_\_\_\_\_
- 13) Health library on the program website\_\_\_\_\_

#### 2. Perceived Benefits of Interactions with Your Peer Navigator

Now we would like to know more about any benefits you may have gained from your interactions with your Peer Navigator. Using the following scale, please indicate your level of agreement with the following statements.

**As a result of my interactions with my Peer Navigator...**

[illegible]

[illegible]
